# Supplementary material
Source: PubMed Central journal article supplement (PMC4165701)

**A**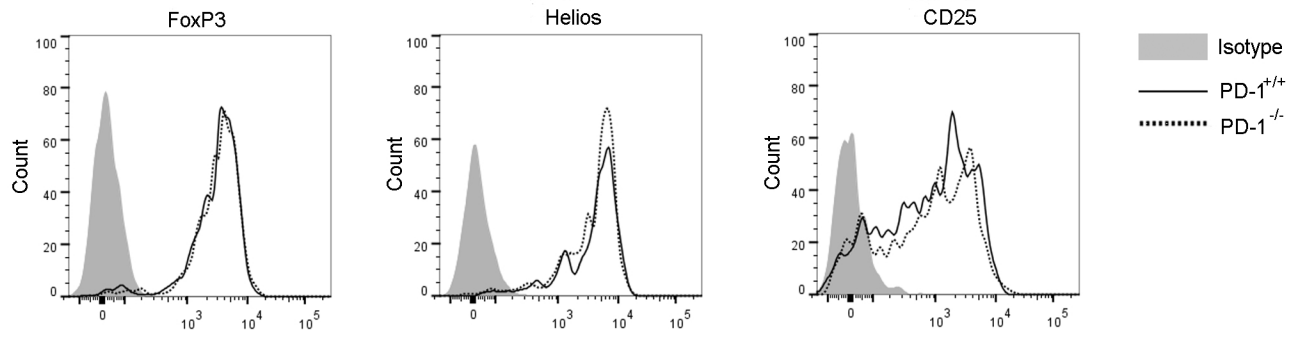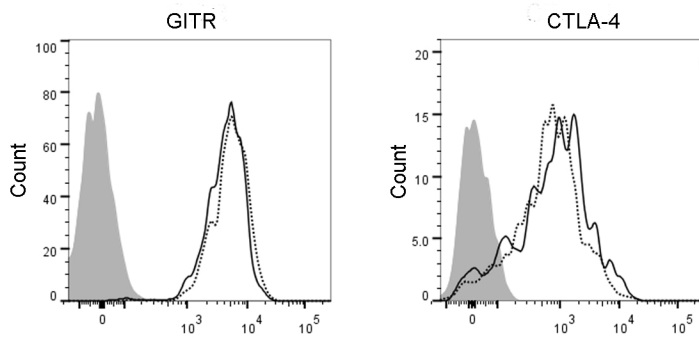**B**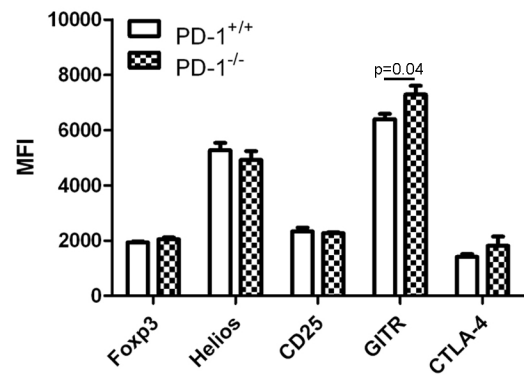**C**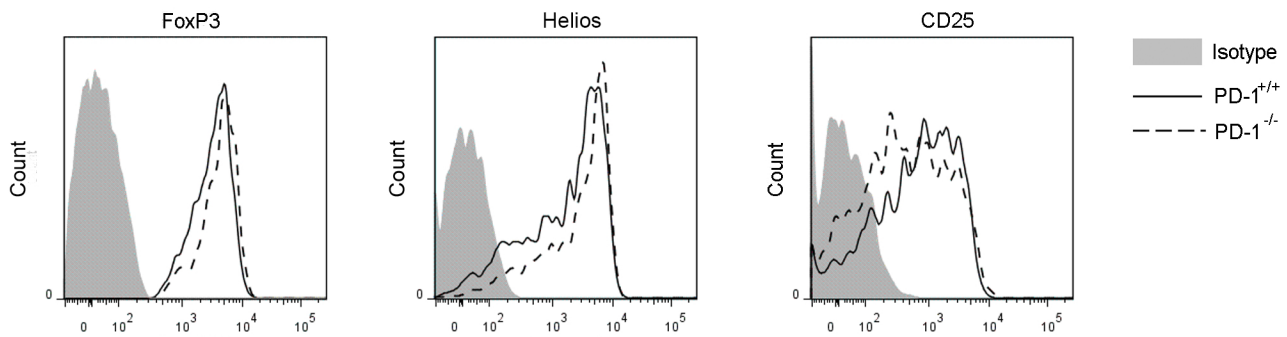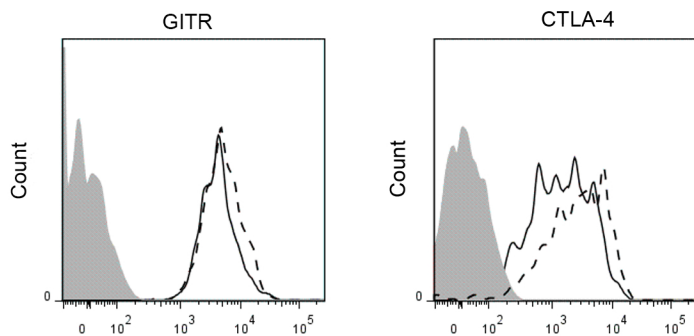**D**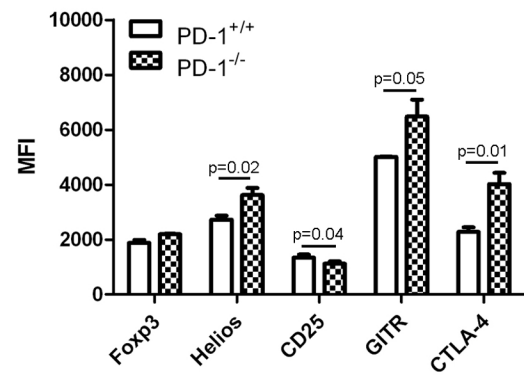

Supplement: NIHMS614752-supplement-Supplementary_Figure_1.pdf [file NIHMS614752-supplement-Supplementary_Figure_1.pdf]
